# Supplementary material for: Microbial Virulence Factors, Antimicrobial Resistance Genes, Metabolites, and Synthetic Chemicals in Cabins of Commercial Aircraft
Source: MDPI journal article supplement (doi:10.3390/metabo13030343), 2023-02-24
Supplement: s1 [file s1]

Table S1. Enriched Virulent Factors in TSC and LSC. The table displays virulent factors that are significantly enriched (LDA > 2, p-value < 0.01 from LefSe analysis and fold changes > 1.5 or < 0.67) in TSC and LSC. The average reads coverage was calculated as the abundance of virulent factors. To determine the potential microbial sources, all sequences were searched against the NCBI-NT databases. Three microbial species with the highest abundance were identified as the main sources of the virulence factors in the aircraft.

| Aircraft | VF category | Subcategory or features    | VF name                                           | Abundance in TSC | Abundance in LSC | TSC/LS C fold changes | p-value | Mainly derived microbial species                                                                     |
|----------|-------------|----------------------------|---------------------------------------------------|------------------|------------------|-----------------------|---------|------------------------------------------------------------------------------------------------------|
| TSC      | Adherence   | Non-fimbrial adherence     | CBPs                                              | 2.9829           | 1.3428           | 2.22                  | 0.0005  | <i>Streptococcus mitis</i> , <i>Streptococcus pneumoniae</i> , <i>Streptococcus pseudopneumoniae</i> |
|          |             | Autotransporter adhesin    | Hia/Hsf                                           | 2.3602           | 0.6836           | 3.45                  | 0.0003  | <i>Haemophilus parainfluenzae</i> , <i>Achromobacter xylosoxidans</i> , <i>Neisseria elongata</i>    |
|          |             |                            | BadA/Vomp                                         | 1.9006           | 0.6462           | 2.94                  | 0.0003  | <i>Veillonella parvula</i> , <i>Stenotrophomonas maltophilia</i> , <i>Agrobacterium tumefaciens</i>  |
|          |             |                            | BoaB                                              | 1.9263           | 0.7361           | 2.62                  | 0.0003  | <i>Veillonella parvula</i> , <i>Haemophilus parainfluenzae</i> , <i>Xanthomonas campestris</i>       |
|          |             |                            | BoaA                                              | 0.6933           | 0.2776           | 2.5                   | 0.0005  | <i>Veillonella parvula</i> , <i>Haemophilus parainfluenzae</i> , <i>Xanthomonas campestris</i>       |
|          |             | Surface-associated adhesin | C5a peptidase ( <i>Streptococcus pyogenes</i> )   | 0.9895           | 0.5207           | 1.9                   | 0.0003  | <i>Gardnerella vaginalis</i> , <i>Finegoldia magna</i> , <i>Rothia mucilaginosa</i>                  |
|          |             |                            | C5a peptidase ( <i>Streptococcus agalactiae</i> ) | 1.0756           | 0.6258           | 1.72                  | 0.0031  | <i>Finegoldia magna</i> , unidentified <i>Hymenobacter</i> , <i>Streptococcus sanguinis</i>          |
|          |             | Cell wall anchored protein | AS                                                | 0.504            | 0.1633           | 3.09                  | 0.0003  | <i>Streptococcus salivarius</i> , <i>Streptococcus sanguinis</i> , <i>Azospirillum brasilense</i>    |
|          |             |                            | Lmb                                               | 0.8011           | 0.4536           | 1.77                  | 0.0071  | <i>Streptococcus sanguinis</i> , <i>Lactococcus lactis</i> , <i>Finegoldia magna</i>                 |
|          |             | Type IV pili               | Type IV pili                                      | 1.521            | 0.9975           | 1.52                  | 0.0023  | unidentified <i>Massilia</i> , <i>Variovorax paradoxus</i> , <i>Stenotrophomonas maltophilia</i>     |
|          | Biofilm     | Quorum sensing             | Fsr                                               | 0.643            | 0.2851           | 2.26                  | 0.0009  | <i>Streptococcus parasanguinis</i> , <i>Streptococcus mitis</i> , <i>Staphylococcus epidermidis</i>  |
|          |             |                            | AI-2                                              | 0.6907           | 0.403            | 1.71                  | 0.0017  | <i>Corynebacterium aurimucosum</i> , <i>Brachybacterium faecium</i> , <i>Propionibacterium acnes</i> |

|     |                              |                         |                                       |        |        |      |        |                                                                                                         |
|-----|------------------------------|-------------------------|---------------------------------------|--------|--------|------|--------|---------------------------------------------------------------------------------------------------------|
|     | Exoenzyme                    | Protease                | Neuraminidase                         | 1.5796 | 0.5049 | 3.13 | 0.0005 | <i>Streptococcus mitis</i> , <i>Streptococcus pneumoniae</i> , <i>Streptococcus oralis</i>              |
|     | Immune modulation            | Lipooligosaccharide     | LOS ( <i>Haemophilus influenzae</i> ) | 3.4053 | 2.2482 | 1.51 | 0.0054 | unidentified <i>Hymenobacter</i> , <i>Veillonella parvula</i> , unidentified <i>Massilia</i>            |
|     |                              | Immunoglobulin protease | IgA1 protease                         | 3.2216 | 0.8907 | 3.62 | 0.0003 | <i>Streptococcus pneumoniae</i> , <i>Streptococcus mitis</i> , <i>Streptococcus gordonii</i>            |
|     | Nutritional/Metabolic factor | Iron uptake             | Isd                                   | 1.0616 | 0.6614 | 1.61 | 0.0091 | unidentified <i>Eubacterium</i> , <i>Coprococcus catus</i> , <i>Staphylococcus aureus</i>               |
|     |                              | Carbohydrate uptake     | Hpt                                   | 0.9551 | 0.5365 | 1.78 | 0.0041 | <i>Klebsiella pneumoniae</i> , <i>Rothia mucilaginosa</i> , <i>Veillonella parvula</i>                  |
| LSC | Adherence                    | Attachment organelle    | Cytadherence organelle                | 0.9559 | 1.5034 | 0.64 | 0.0092 | <i>Corynebacterium aurimucosum</i> , <i>Corynebacterium testudinoris</i> , <i>Brevibacterium linens</i> |

Table S2. Enriched antibiotic resistance genes in TSC and LSC. Only significantly enriched ARGs with LDA > 2, p-value < 0.01 (as determined by LEfSe analysis) and abundance fold changes > 1.5 or < 0.67 are displayed. The abundance of ARGs was calculated as the average reads coverage. The potential microbial sources for each ARG were identified by searching its sequence against the NCBI-NT databases. The two microbial species with the highest abundance were considered as the main source of the ARG in the aircraft and are listed in the table.

| Group | ARG category          |        | ARG Name | AMR Gene Family                           | abundance TSC | abundance LSC | TSC/LSC fold changes | p-value | Mainly derived microbial species                                                              |
|-------|-----------------------|--------|----------|-------------------------------------------|---------------|---------------|----------------------|---------|-----------------------------------------------------------------------------------------------|
| LSC   | antibiotic alteration | target | vanSF    | glycopeptide resistance gene cluster;vanS | 0.7263        | 1.2125        | 0.6                  | 0.0031  | <i>Variovorax paradoxus</i> , unidentified <i>Massilia</i> , unidentified <i>Sphingomonas</i> |
|       |                       |        | vanRA    | glycopeptide resistance gene cluster;vanR | 0.3509        | 0.5801        | 0.6                  | 0.0092  | unidentified <i>Massilia</i> , <i>Paracoccus denitrificans</i> , <i>Variovorax paradoxus</i>  |

|                   |       |                                              |        |        |      |        |                                                                                                               |
|-------------------|-------|----------------------------------------------|--------|--------|------|--------|---------------------------------------------------------------------------------------------------------------|
| antibiotic efflux | QepA1 | major facilitator superfamily (MFS)          | 0.3906 | 0.6529 | 0.6  | 0.0023 | <i>Nocardioides sp. JS614</i> , <i>Methylobacterium radiotolerans</i> ,<br>unidentified <i>Curtobacterium</i> |
|                   | mtrA  | resistance-nodulation-cell division<br>(RND) | 0.6306 | 1.0979 | 0.57 | 0.0071 | unidentified <i>Sphingomonas</i> , unidentified <i>Massilia</i> , <i>Variovorax paradoxus</i>                 |

Table S3. Potential risk chemicals in TSC and LSC. The potential risk chemicals are those that are classified under the hazard codes H300 to H336 according to the Globally Harmonized System (GHS) for indicating skin, eye, and airway irritation. The enriched risk chemicals in TSC and LSC were determined to be statistically significant ( $p < 0.01$ ,  $FDR < 0.1$ , fold change  $> 2$ ). Note that chemicals classified as drugs are excluded from this table.

| group | Risk chemical category | Risk chemical | Molecular formula                                               | GHS hazard statement                                                                                                                        | Symptom, disorder and disease                                      | TSC/LSC<br>changes | fold<br>p-value |
|-------|------------------------|---------------|-----------------------------------------------------------------|---------------------------------------------------------------------------------------------------------------------------------------------|--------------------------------------------------------------------|--------------------|-----------------|
|       |                        | Benfuracarb   | C <sub>20</sub> H <sub>30</sub> N <sub>2</sub> O <sub>5</sub> S | H331: Toxic if inhaled                                                                                                                      | eye irritation                                                     |                    | 3.35 0.0004     |
|       |                        | Carbofuran    | C <sub>12</sub> H <sub>15</sub> NO <sub>3</sub>                 | H330: Fatal if inhaled                                                                                                                      | abdominal pain; vomiting; skin irritation                          |                    | >10 0.0002      |
|       |                        | Famoxadone    | C <sub>22</sub> H <sub>18</sub> N <sub>2</sub> O <sub>4</sub>   |                                                                                                                                             | eye and skin irritant                                              |                    |                 |
|       |                        | Fenoxycarb    | C <sub>17</sub> H <sub>19</sub> NO <sub>4</sub>                 |                                                                                                                                             | headache, nausea, vomiting                                         |                    | >10 0.0006      |
|       |                        |               |                                                                 | H315 (40.8%): Causes skin irritation<br>H319 (40.8%): Causes serious eye<br>irritation<br>H335 (40.8%): May cause respiratory<br>irritation | irritation eyes, skin, upper respiratory system; thyroid<br>injury |                    |                 |
| TSC   | pesticide/herbicide    | Bromacil      | C <sub>9</sub> H <sub>13</sub> BrN <sub>2</sub> O <sub>2</sub>  |                                                                                                                                             |                                                                    |                    | 2.74 0.0015     |

|                                  |           |                                |                                                   |                                                          |                                                                      |             |
|----------------------------------|-----------|--------------------------------|---------------------------------------------------|----------------------------------------------------------|----------------------------------------------------------------------|-------------|
|                                  |           | Propazine                      | C <sub>9</sub> H <sub>16</sub> ClN <sub>5</sub>   | shortness of breath, muscle spasms, ataxia, and anorexia | 3.16                                                                 | 0.0008      |
|                                  |           |                                |                                                   |                                                          |                                                                      |             |
|                                  |           |                                |                                                   | H315 (29.76%): Causes skin irritation                    |                                                                      |             |
|                                  |           |                                |                                                   | H318 (16.88%): Causes serious eye damage                 | atopic dermatitis                                                    |             |
|                                  |           |                                |                                                   | H319 (82.38%): Causes serious eye irritation             |                                                                      |             |
|                                  |           | Triethanolamine                | C <sub>6</sub> H <sub>15</sub> NO <sub>3</sub>    |                                                          | 2.36                                                                 | 0.0004      |
|                                  |           |                                |                                                   |                                                          |                                                                      |             |
|                                  |           |                                |                                                   | H315: Causes skin irritation                             |                                                                      |             |
|                                  |           |                                |                                                   |                                                          | liver neoplasms;heart diseases;malformations of cortical development |             |
|                                  |           | Diethanolamine                 | C <sub>4</sub> H <sub>11</sub> NO <sub>2</sub>    | H318: Causes serious eye damage                          | 2.81                                                                 | 0.0004      |
|                                  |           |                                |                                                   |                                                          |                                                                      |             |
|                                  |           |                                |                                                   | H311 (99.93%): Toxic in contact with skin                |                                                                      |             |
|                                  |           |                                |                                                   | H314 (100%): Causes severe skin burns and eye damage     | skin,eye irritation; vomiting                                        |             |
|                                  |           | m-Cresol                       | C <sub>7</sub> H <sub>8</sub> O                   |                                                          | 2.47                                                                 | 0.0004      |
|                                  |           |                                |                                                   |                                                          |                                                                      |             |
|                                  |           | Diethyl phthalate              | C <sub>12</sub> H <sub>14</sub> O <sub>4</sub>    | reproductive and developmental toxicity                  | 3.84                                                                 | 0.0004      |
|                                  |           |                                |                                                   |                                                          |                                                                      |             |
|                                  |           |                                |                                                   | H315 (100%): Causes skin irritation                      |                                                                      |             |
|                                  |           |                                |                                                   | H319 (29.81%): Causes serious eye irritation             |                                                                      |             |
|                                  |           |                                |                                                   | H332 (100%): Harmful if inhaled                          |                                                                      |             |
|                                  |           |                                |                                                   | H335 (26.4%): May cause respiratory irritation           | dermatitis; irritation; inflammation                                 |             |
| detergents and cleaning products | o-Xylene  | C <sub>8</sub> H <sub>10</sub> |                                                   |                                                          | 3.55                                                                 | 0.0008      |
|                                  |           |                                |                                                   |                                                          |                                                                      |             |
| LSC                              | herbicide | Alachlor                       | C <sub>14</sub> H <sub>20</sub> ClNO <sub>2</sub> | H317: May cause an allergic skin reaction                | dermatitis; chronic inflammation                                     | 0.12 0.0004 |

Table S4. Potential protective metabolites in TSC and LSC. Flavonoids, isoflavonoids, indoles, and keto acids are characterized as protective metabolites for humans. The significantly enriched metabolites in these categories in TSC and LSC were determined to be statistically significant ( $p < 0.01$ , FDR  $< 0.1$ , fold change  $> 2$ ). The molecular formula and features were obtained from PubChem. Metabolites annotated as synthetic drugs are excluded from this table.

| Group | Protective metabolite category | Protective metabolite | Molecular formula                                             | Feature                                                 | TSC/LSC fold changes | p-value |
|-------|--------------------------------|-----------------------|---------------------------------------------------------------|---------------------------------------------------------|----------------------|---------|
| TSC   | Indoles and derivatives        | Indoleacetaldehyde    | C <sub>10</sub> H <sub>9</sub> NO                             | intermediate metabolite in the metabolism of tryptophan | >2                   | 0.0002  |
|       | Indoles and derivatives        | N-Acetylserotonin     | C <sub>12</sub> H <sub>14</sub> N <sub>2</sub> O <sub>2</sub> | antioxidant                                             | 0.33                 | 0.0004  |
| LSC   |                                | Kaempferol            | C <sub>15</sub> H <sub>10</sub> O <sub>6</sub>                | a plant metabolite, antioxidant                         | 0.46                 | 0.0022  |
|       |                                | Genistein             | C <sub>15</sub> H <sub>10</sub> O <sub>5</sub>                | a plant metabolite, antioxidant                         | 0.25                 | 0.0008  |
|       | Flavonoids                     | 6-Hydroxydaidzein     | C <sub>15</sub> H <sub>10</sub> O <sub>5</sub>                | derived from daidzein, anti-inflammatory                | 0.29                 | 0.0004  |
|       |                                | Oxoadipic acid        | C <sub>6</sub> H <sub>8</sub> O <sub>5</sub>                  | natural metabolic product found in bacteria and human   |                      | 0.002   |
|       | Keto acids and derivatives     |                       |                                                               |                                                         | 0.44                 |         |
